# Supplementary material
Source: publisher site journal article supplement (https://www.dovepress.com/article/431362)
Supplement: Supplementary file 1 [file get_supplementary_file.php]

# Appendix A: Survey Questionnaire

**Demographics:**

1. Age
2. Gender
3. Education
4. Employment status

**Main questions**

1. How often do you use the internet to search for health information or advice?

- One or more times in a day
- One or more times in a week
- Once in a month
- Once in three months
- Rarely
- Never

1. Have you ever come across health-related information online that you later found out was incorrect or misleading?

Yes

No

1. How do you typically evaluate the accuracy and reliability of health information that you find online?

- Source evaluation
- Expertise and author credentials
- Consistency with established knowledge
- Quality of references and citations
- Publication or website reputation
- Critical thinking and scepticism
- Cross-referencing and corroboration

1. Have you ever changed your health behaviors or beliefs based on information you found online?

Yes

No

1. Have you ever shared misleading health-related information with others online?

Yes

No

1. How concerned are you about the presence of online health-related disinformation (incorrect or misleading information; or false information that is deliberately created and deceptive; or the intentional spread of misinformation)?

- Not at all concerned
- Slightly concerned
- Moderately concerned
- Very concerned
- Extremely concerned

1. Have you noticed any negative consequences or effects of online health-related disinformation?

Yes

No

1. Have you ever been influenced by health-related information that you found on social media?

Yes

No

1. Do you believe that online platforms have a responsibility to prevent the spread of health-related disinformation?

Yes

No

1. What steps do you think could be taken to prevent or mitigate the impact of online health-related disinformation?

- Strengthen media literacy and critical thinking skills
- Enhance digital platform responsibility
- Strengthen regulatory frameworks
- Promote partnerships and information sharing between public health authorities, healthcare professionals, academic institutions, and technology companies
- Invest in public health communication
- Support fact-checking organizations
- Empower healthcare professionals in disseminating health information
- Encourage responsible journalism

1. Have you ever encountered conflicting health information online?

Yes

No

1. Have you ever questioned the accuracy or reliability of health information provided by a healthcare provider based on information you found online?

Yes

No

1. Have you ever avoided seeking medical treatment or advice based on information you found online?

Yes

No

1. Do you think that the presence of online health-related disinformation has affected public trust in healthcare professionals or institutions?

Yes

No

1. Have you ever reported health-related mis/disinformation that you found online?

Yes

No

1. How do you think that online platforms could better educate the public about how to evaluate the accuracy and reliability of health information online?

- Promote reliable sources
- Provide clear guidelines and policies
- Offer educational resources
- Collaborate with experts, healthcare authorities, and organizations
- Utilize pop-up warnings or flags
- Incorporate user feedback mechanisms
- Provide fact-checking resources
- Tailor educational efforts to different demographics

1. Have you ever been exposed to online health-related disinformation that was targeted specifically at certain groups or individuals (e.g. based on race, gender, age, etc.)?

Yes

No

1. How important do you think it is for online platforms to fact-check health-related information before allowing it to be shared online?

- Not at all important
- Slightly important
- Moderately important
- Very important
- Extremely important

1. Do you think that health-related disinformation is a significant public health issue?

Yes

No

1. How do you think that individuals can protect themselves from the negative effects of online health-related disinformation?

- Source evaluation
- Expertise and author credentials
- Consistency with established knowledge
- Quality of references and citations
- Publication or website reputation
- Critical thinking and scepticism
- Cross-referencing and corroboration
